# Supplementary material for: Facile and scalable fabrication of three-dimensional Cu(OH)2nanoporous nanorods for solid-state supercapacitors
Source: Royal Society of Chemistry journal article supplement (doi:10.1039/c5ta04164c), 2015-01-01
Supplement: c5ta04164c1.pdf [file c5ta04164c1.pdf]

## Supplementary Data

### Facile and scalable fabrication of three-dimensional Cu(OH)<sub>2</sub> nanoporous nanorods for solid-state supercapacitors†

Jizhang Chen,<sup>a</sup> Junling Xu,<sup>a</sup> Shuang Zhou,<sup>a</sup> Ni Zhao\*<sup>a</sup> and Ching-Ping Wong\*<sup>a,b</sup>

<sup>a</sup> Department of Electronic Engineering, The Chinese University of Hong Kong, New Territories, Hong Kong. E-mail: nzhao@ee.cuhk.edu.hk (N. Zhao), cpwong@cuhk.edu.hk (C. Wong).

<sup>b</sup> School of Materials Science and Engineering, Georgia Institute of Technology, Atlanta, Georgia 30332, United States.

E-mail addresses: nzhao@ee.cuhk.edu.hk (N. Zhao), cpwong@cuhk.edu.hk (C. Wong).

#### Calculation methods

##### 1. Three-electrode configuration

The areal capacitance  $C_a$  (F cm<sup>-2</sup>) and gravimetric capacitance  $C_g$  (F g<sup>-1</sup>) of the Cu(OH)<sub>2</sub> could be calculated from the corresponding cyclic voltammetry curve by the following equations:

$$C_a = \frac{\int I(V)dV}{2\nu S\Delta V} \quad (1)$$

$$C_g = \frac{\int I(V)dV}{2\nu m\Delta V} \quad (2)$$

where  $I(V)$  (A) is the response current,  $V$  (V) is the potential vs. SCE,  $\nu$  (V s<sup>-1</sup>) is the scan rate,  $S$  (cm<sup>2</sup>) is the effective area of the electrode,  $m$  (g) is the mass of the active material on the electrode,  $\Delta V$  (V) is the working potential.

$C_a$  (F cm<sup>-2</sup>) and  $C_g$  (F g<sup>-1</sup>) could also be calculated from the corresponding galvanostatic discharging curve using the following equations:

$$C_a = \frac{I\Delta t}{S\Delta V} \quad (3)$$

$$C_g = \frac{I\Delta t}{m\Delta V} \quad (4)$$

where  $I$  (A) is the discharging current,  $\Delta t$  (s) is the discharging time,  $S$  (cm<sup>2</sup>) is the effective area of the electrode,  $m$  (g) is the mass of the active material on the electrode,  $\Delta V$  (V) is the working

potential.

The equivalent series resistance ( $R_{ESR}$ ) ( $\Omega$ ) could be calculated by:

$$R_{ESR} = \frac{V_{drop}}{2I} \quad (5)$$

where  $V_{drop}$  (V) is the abrupt voltage drop at the beginning of the discharging curve,  $I$  (A) is the corresponding current.

## 2. Two-electrode system (asymmetric supercapacitor, denoted as ASC)

The specific capacitance  $C_{ASC}$  ( $F\ g^{-1}$ ) of the ASC could be calculated from the corresponding galvanostatic discharging curve according to the following equation:

$$C_{ASC} = \frac{I\Delta t}{M\Delta V} \quad (6)$$

where  $I$  (A) is the discharging current,  $\Delta t$  (s) is the discharging time,  $\Delta V$  (V) is the potential window during the discharging process,  $M$  (g) is the total mass of active materials in the ASC.

The energy density  $E$  ( $mWh\ cm^{-3}$ ) and average power density  $P$  ( $mW\ cm^{-3}$ ) could be calculated as:

$$E = \frac{\int V(t)dtI}{3.6Vol} \quad (7)$$

$$P = \frac{3600 E}{t} \quad (8)$$

where  $V(t)$  (V) is the potential of the ASC,  $t$  (s) is the corresponding discharging time,  $I$  (A) is the discharging current,  $Vol$  ( $cm^3$ ) is the volume of the ASC including the volumes of two Cu foil current collectors and the gel electrolyte.

## Supplementary Figures

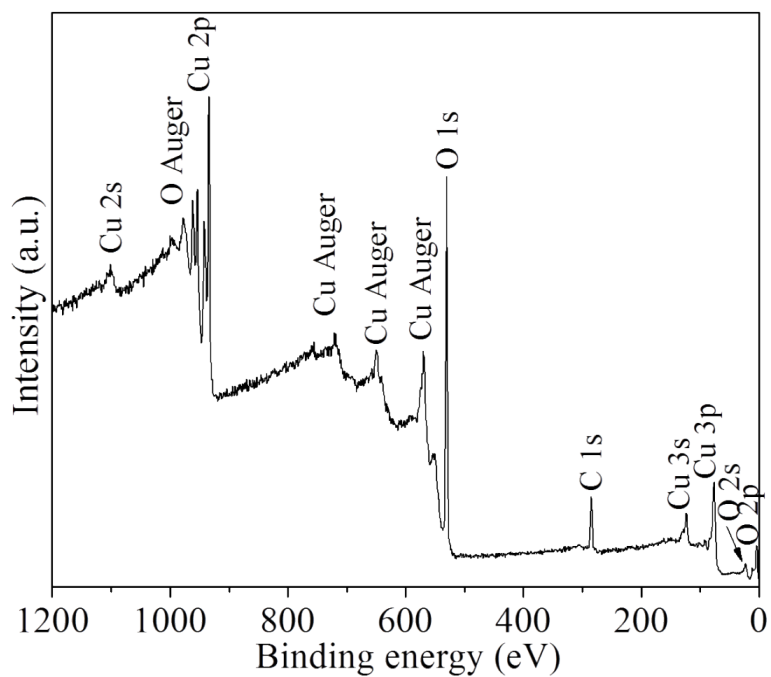

**Fig. S1** Survey XPS spectrum of 3-D  $\text{Cu}(\text{OH})_2$ .

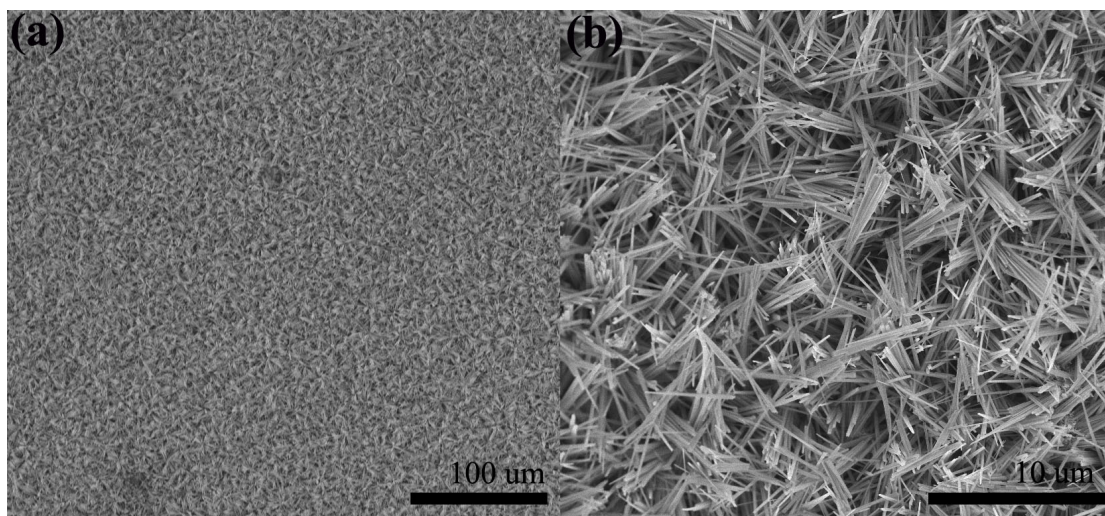

**Fig. S2** (a,b) Low-magnification SEM images of 3-D Cu(OH)<sub>2</sub>.

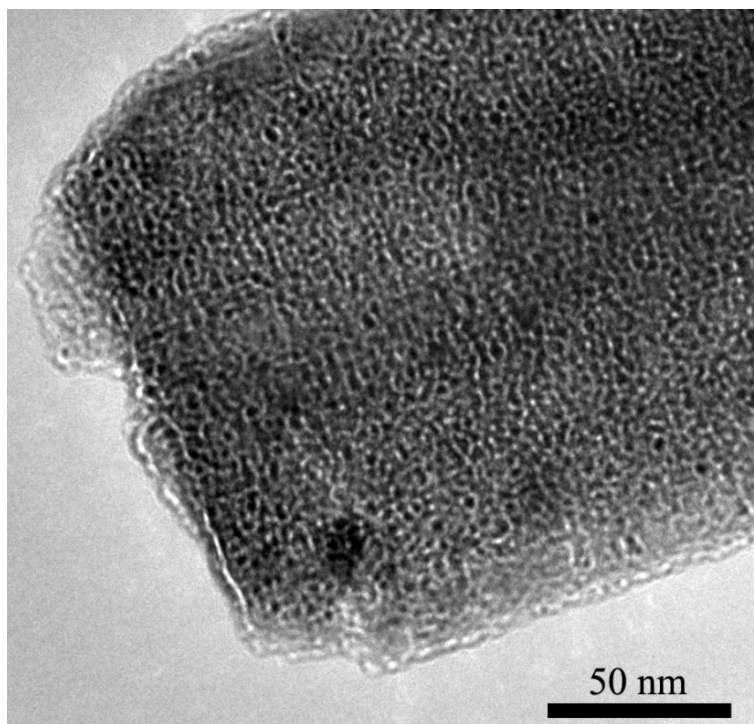

**Fig. S3** Magnified TEM image of 3-D Cu(OH)<sub>2</sub> from Fig. 3d.

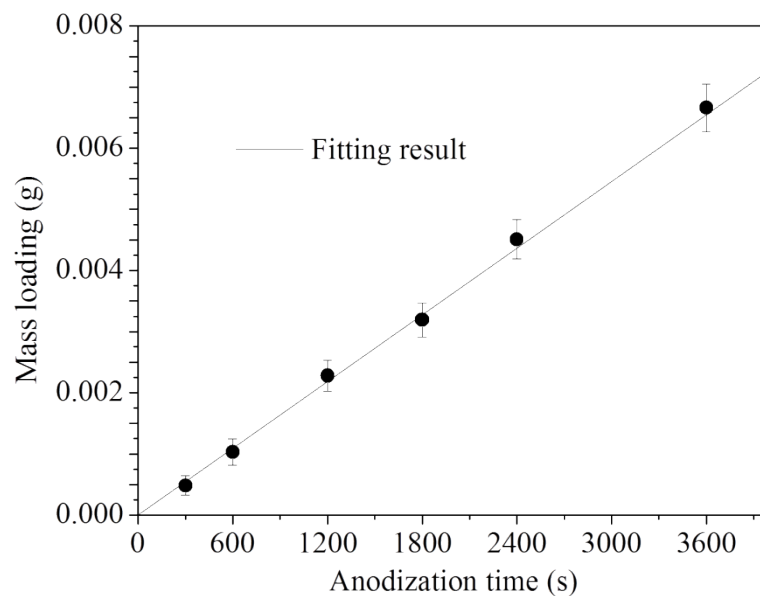

**Fig. S4** Mass loading of  $\text{Cu}(\text{OH})_2$  on the  $2 \times 3 \text{ cm}^2$   $\text{Cu}(\text{OH})_2/\text{Cu}$  slice ( $2 \times 2 \text{ cm}^2$  covered by  $\text{Cu}(\text{OH})_2$ ) with respect to different anodization time.

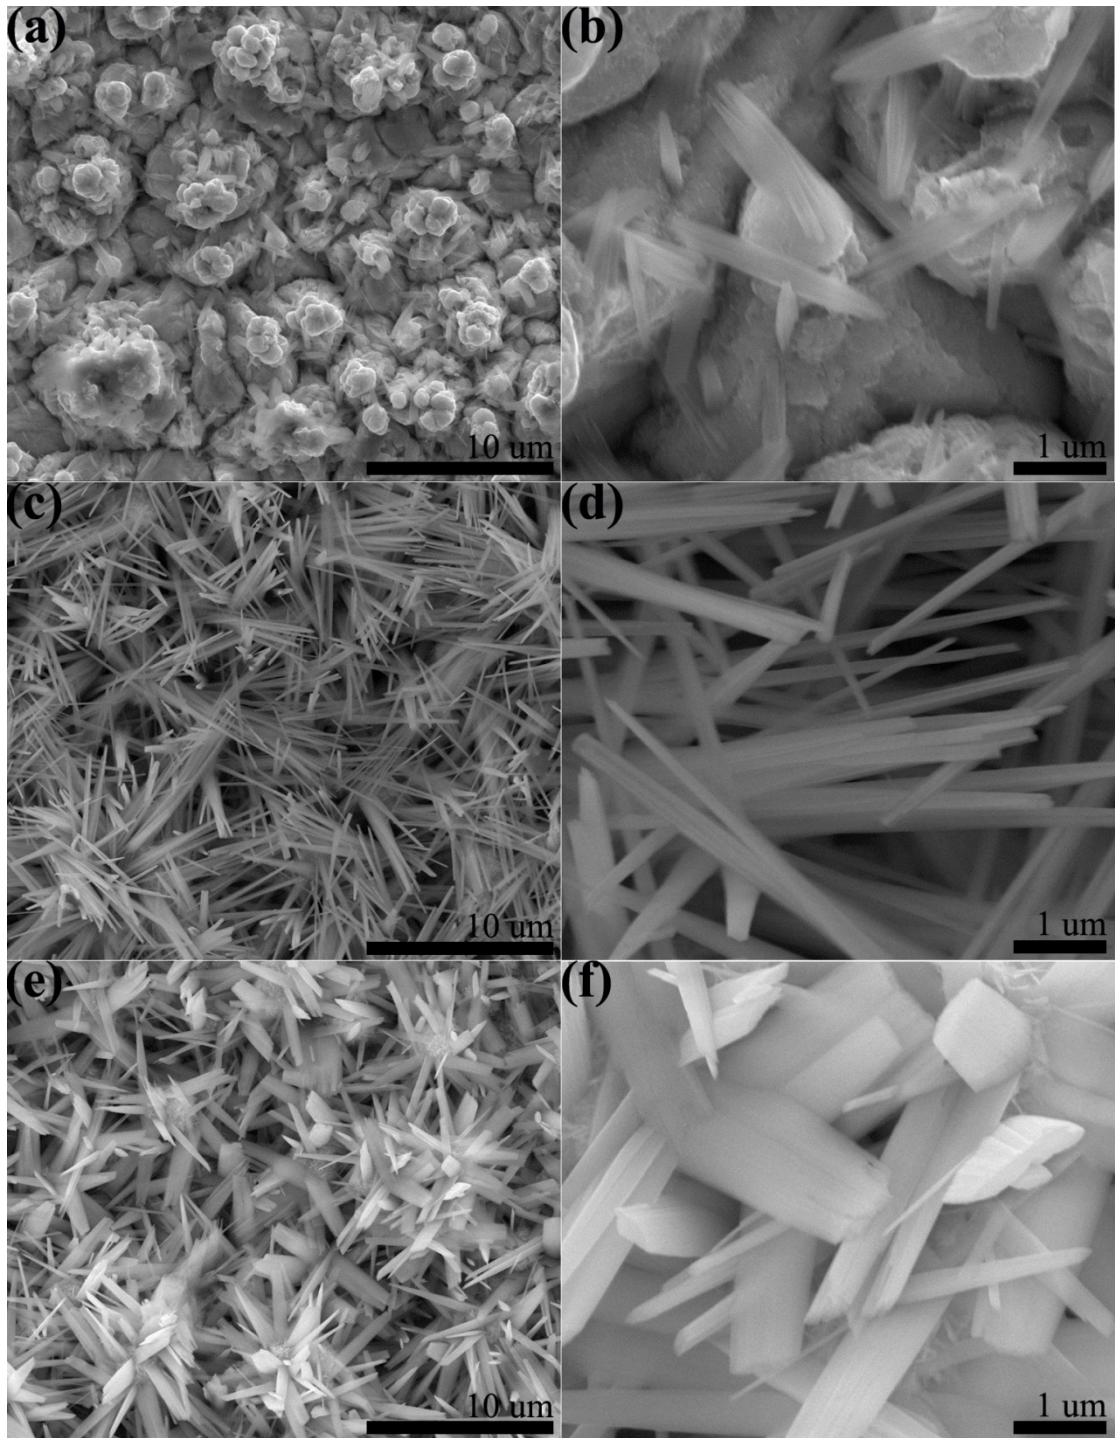

**Fig. S5** SEM images of 3-D Cu(OH)<sub>2</sub> with respect to the different anodization time: (a, b) 100 s; (c, d) 1800 s; (e, f) 3600 s.



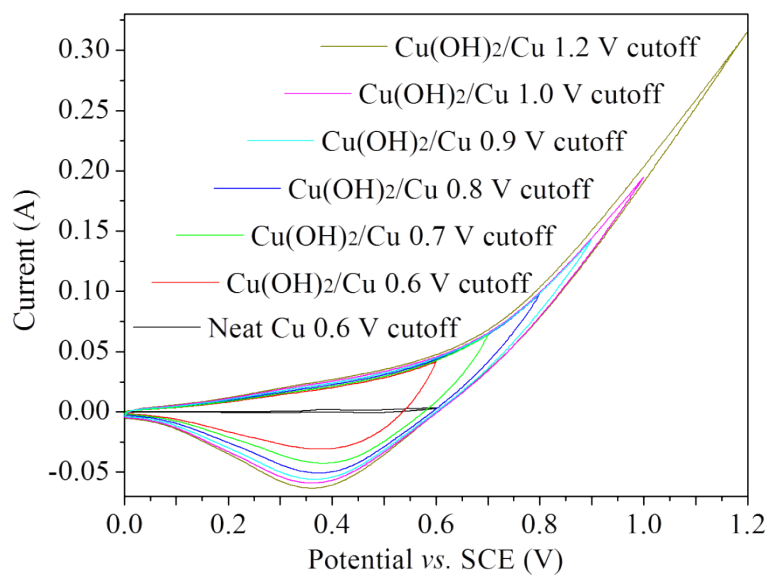

**Fig. S6** CV curves of the neat Cu slice with a potential cutoff of 0.6 V at 50 mV s<sup>-1</sup> and the Cu(OH)<sub>2</sub>/Cu slice with potential cutoffs from 0.6 to 1.2 V at 50 mV s<sup>-1</sup>.

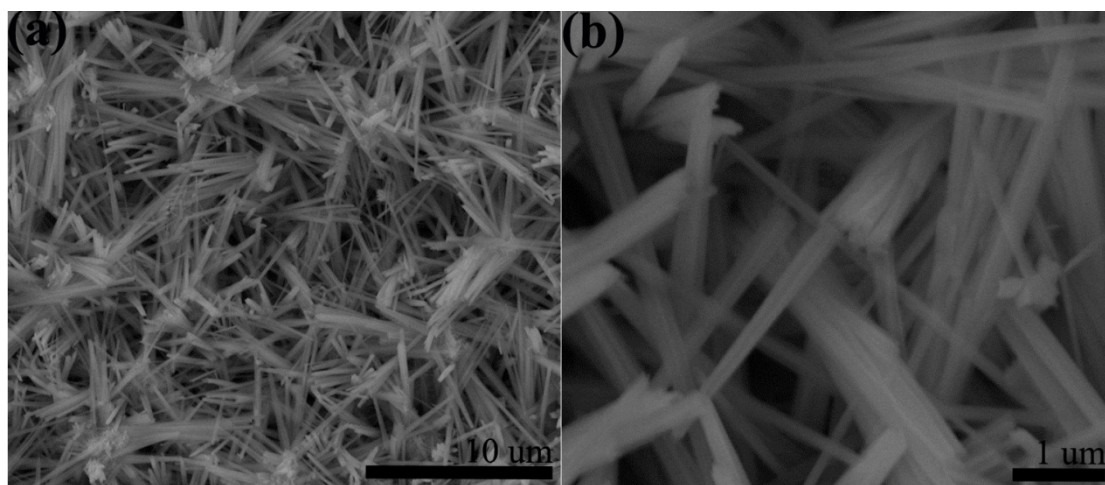

**Fig. S7** (a,b) SEM images of 3-D Cu(OH)<sub>2</sub> after 5000 cycles.

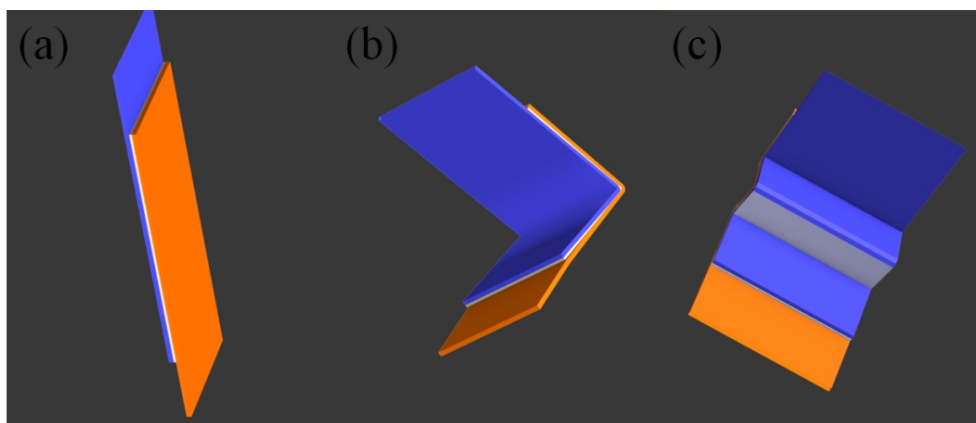

**Fig. S8** Graphic illustrations of the Cu(OH)<sub>2</sub>//AC solid-state ASC under (a) normal state, (b) bended by one fold and (c) bended by three folds.

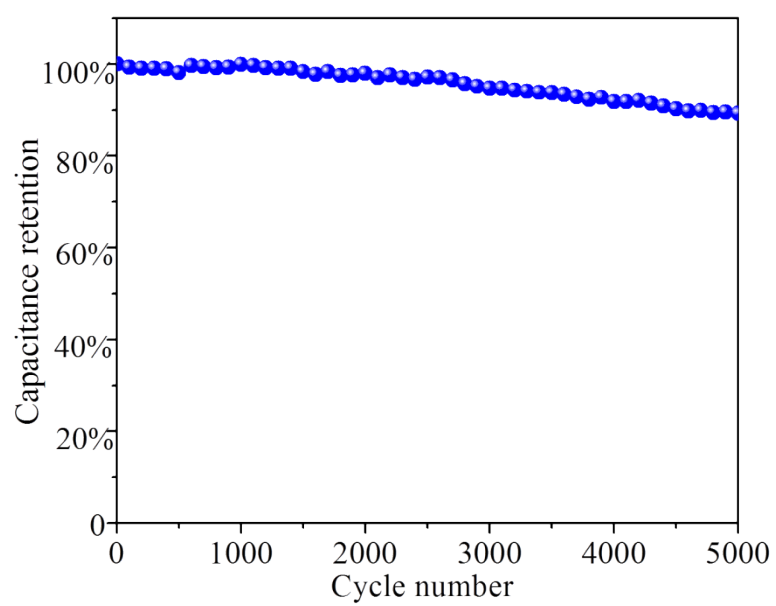

**Fig. S9** Cycling performance of Cu(OH)<sub>2</sub>//AC solid-state ASC at 10 A g<sup>-1</sup>.



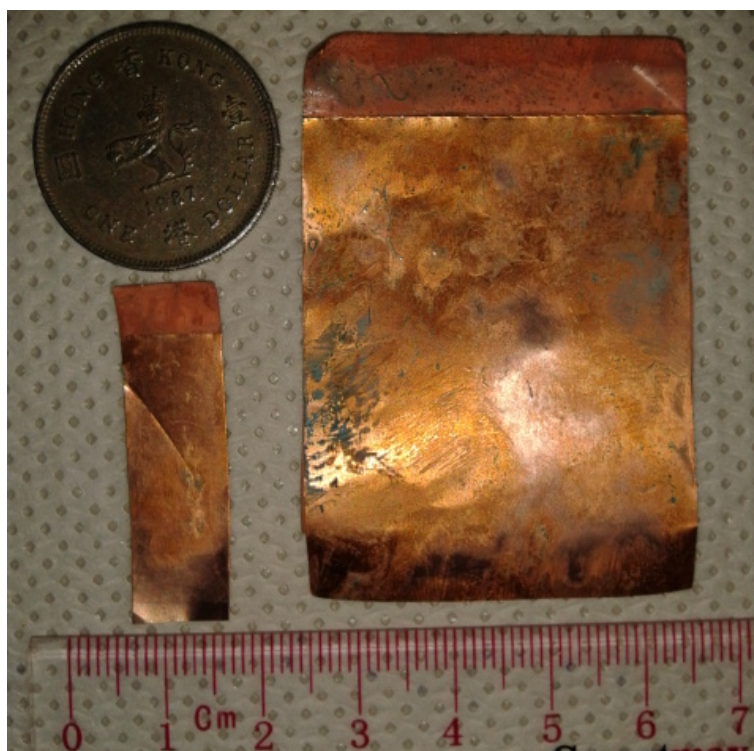

**Fig. S10** Photographs of  $1 \times 4 \text{ cm}^2$  (left) and  $4 \times 6 \text{ cm}^2$  (right)  $\text{Cu}(\text{OH})_2//\text{AC}$  solid-state ASCs.

**Video S1** Demonstration of our tandem device (consisting of two  $4 \times 6 \text{ cm}^2$  solid-state ASCs) powering 26 LEDs.
